# Supplementary material for: Canagliflozin reduces inflammation and fibrosis biomarkers: a potential mechanism of action for beneficial effects of SGLT2 inhibitors in diabetic kidney disease
Source: PubMed Central journal article supplement (PMC6560022; doi:10.1007/s00125-019-4859-4), 2019-04-17
Supplement: 125_2019_4859_MOESM1_ESM.pdf [file 125_2019_4859_MOESM1_ESM.pdf]

Supplementary Table 1: Baseline characteristics of patients with UACR >1.7 mg/mmol and overall clinical trial population. Data are mean (SD) or number (%), unless otherwise indicated.

|                                    | Overall population<br>(N=1450) | UACR>1.7mg/mmol<br>(N=296) |
|------------------------------------|--------------------------------|----------------------------|
| Age, years                         | 56.2 (9.2)                     | 56.3 (8.8)                 |
| Female sex, N %                    | 694 (48%)                      | 127 (43%)                  |
| Systolic BP, mmHg                  | 130 (13)                       | 134 (13)                   |
| Diastolic BP, mmHg                 | 79 (8)                         | 81 (8)                     |
| Body mass index, kg/m <sup>2</sup> | 30.9 (5.5)                     | 30.7 (5.3)                 |
| HbA1c, mmol/mol                    | 62 (9)                         | 63 (9)                     |
| HbA1c, %                           | 7.8 (0.8)                      | 7.9 (0.8)                  |
| eGFR, ml/min/1.73m <sup>2</sup>    | 90.2 (19)                      | 89.9 (18)                  |
| UACR*, mg/mmol                     | 1.0                            | 3.7                        |

BP = blood pressure; eGFR, estimated glomerular filtration rate; UACR, urinary albumin:creatinine ratio. \*Medians are reported
